# Supplementary material for: 200-years ice core bromine reconstruction at Dome C (Antarctica): observational and modelling results
Source: Copernicus journal article supplement (doi:10.5194/tc-2022-139), 2022-09-02
Supplement: Supplementary file 1 [file tc-2022-139-supplement-version3.pdf]

## SUPPLEMENTARY INFORMATION

### **200-years ice core bromine reconstruction at Dome C (Antarctica): observational and modelling results**

François Burgay<sup>1,2</sup>, Rafael Pedro Fernández<sup>3</sup>, Delia Segato<sup>2,4</sup>, Clara Turetta<sup>2,4</sup>, Christopher S. Blaszcak-Boxe<sup>5</sup>, Rachael H. Rhodes<sup>6</sup>, Claudio Scharchilli<sup>7</sup>, Virginia Ciardini<sup>7</sup>, Carlo Barbante<sup>2,4</sup>, Alfonso Saiz-Lopez<sup>8</sup> & Andrea Spolaor<sup>2,4\*</sup>

<sup>1</sup>Paul Scherrer Institute, Laboratory of Environmental Chemistry (LUC), 5232 Villigen PSI, Switzerland

<sup>2</sup>University Ca' Foscari of Venice, Department of Environmental Sciences, Informatics and Statistics, 30172 Venice Mestre, Italy

<sup>3</sup>Institute for Interdisciplinary Science, National Research Council (ICB-CONICET), FCEN-UNCuyo, Mendoza, 5501, Argentina

<sup>4</sup>National Research Council, Institute of Polar Sciences, 30172 Venice Mestre, Italy

<sup>5</sup>Interdisciplinary Studies Department, Howard University, 20059 Washington DC, United States

<sup>6</sup>Department of Earth Sciences, University of Cambridge, Cambridge, United Kingdom

<sup>7</sup>Laboratory of Observations And Measures for the Environment and Climate (SSPT-PROTER-OEM), ENEA, Rome, Italy

<sup>8</sup>Department of Atmospheric Chemistry and Climate, Institute of Physical Chemistry Rocasolano, CSIC, Madrid, Spain

\*Corresponding author: [andrea.spolaor@unive.it](mailto:andrea.spolaor@unive.it)

Number of pages: 4

Number of figures: 3

SUPPORTING INFORMATION SUMMARY: we provide further information about the photolysis rate at different wavelength ranges and additional figures that show the negligible role of volcanic eruptions in affecting bromine preservation at Dome C and sea-ice variability in East Antarctica (1979-2012)

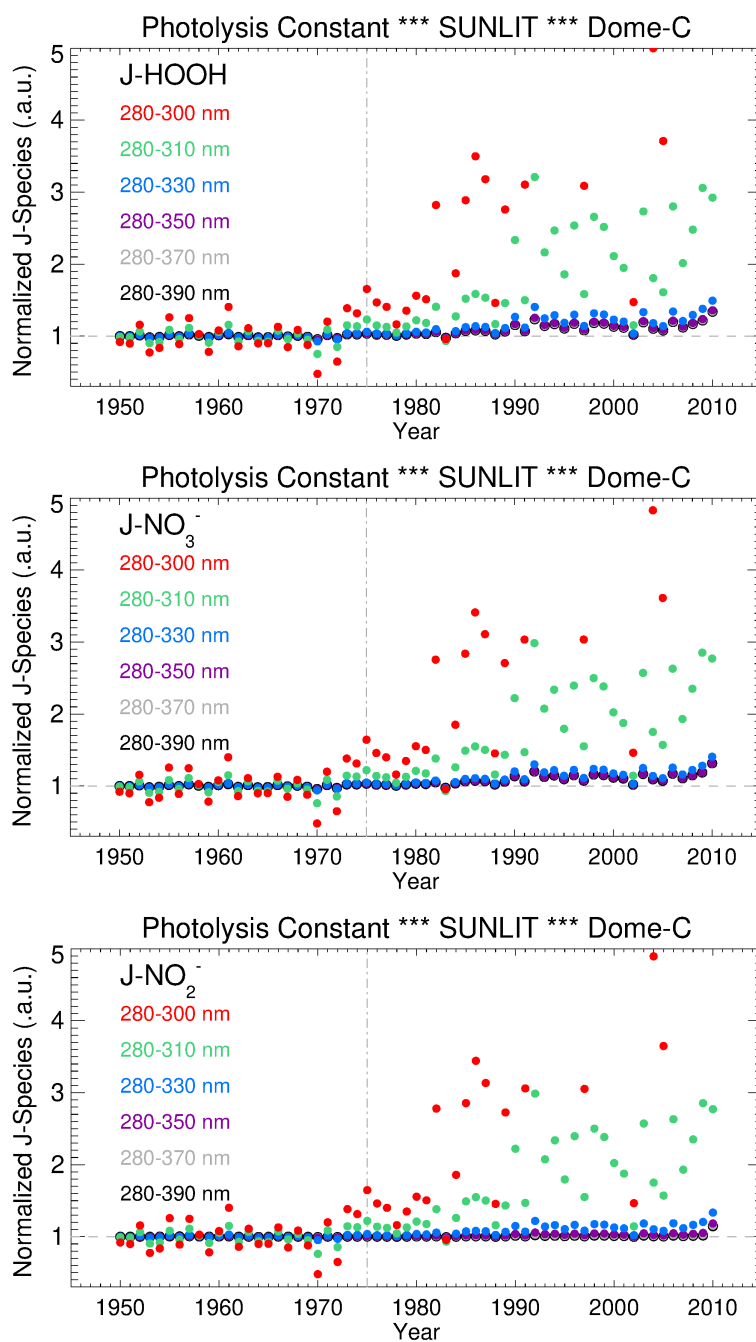

**Figure S1** - The photolysis rate (normalized J-value) is reported for H<sub>2</sub>O<sub>2</sub> (upper panel), NO<sub>3</sub><sup>-</sup> (middle panel) and NO<sub>2</sub><sup>-</sup> (bottom panel) calculated over different wavelength ranges (see main text for more details).

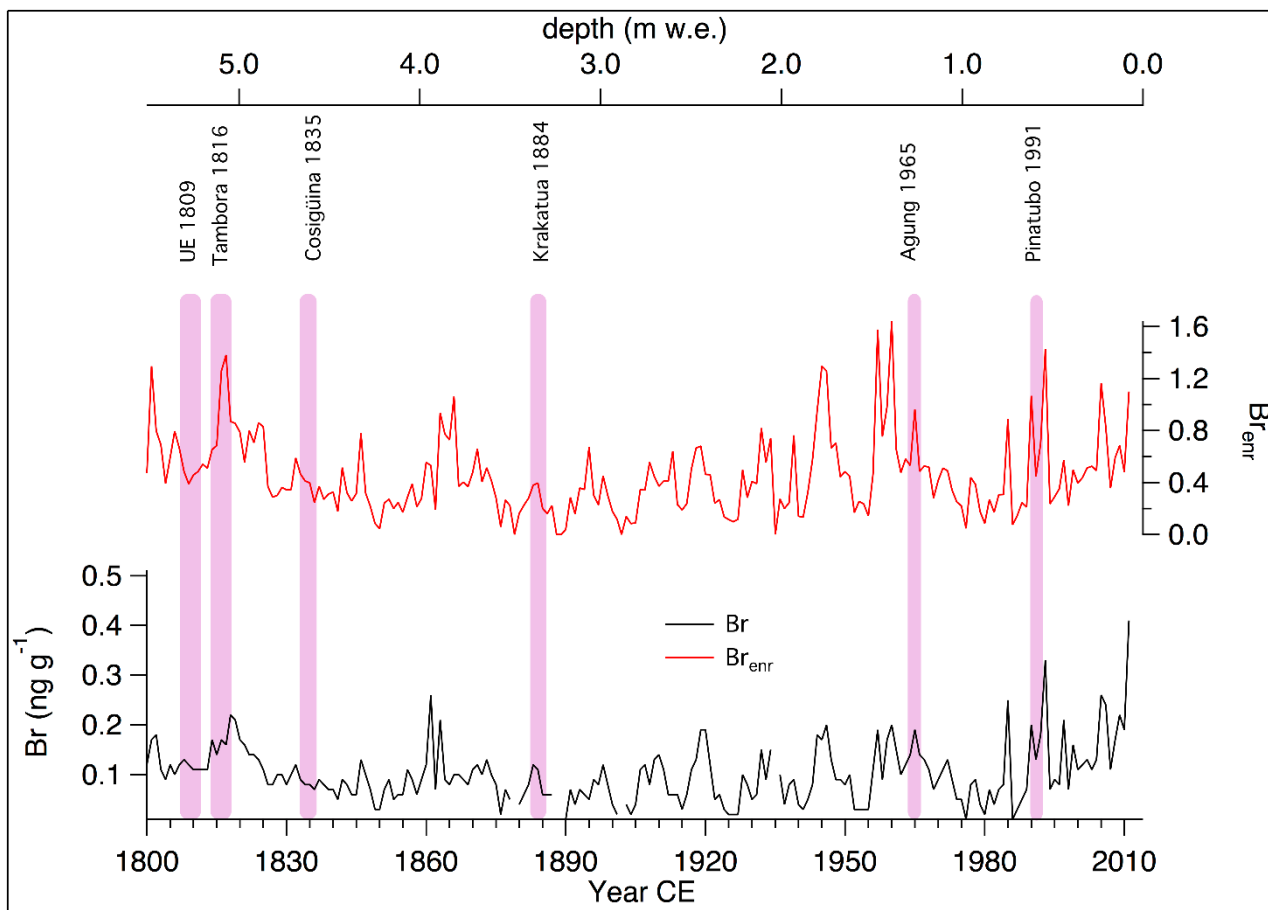

**Figure S2** -  $Br_{enr}$  (top, red curve),  $Br$  (bottom, black curve) records and volcanic eruptions (highlighted with pink vertical bar). Ice core depth is expressed as meters of water equivalent (m w.e.).

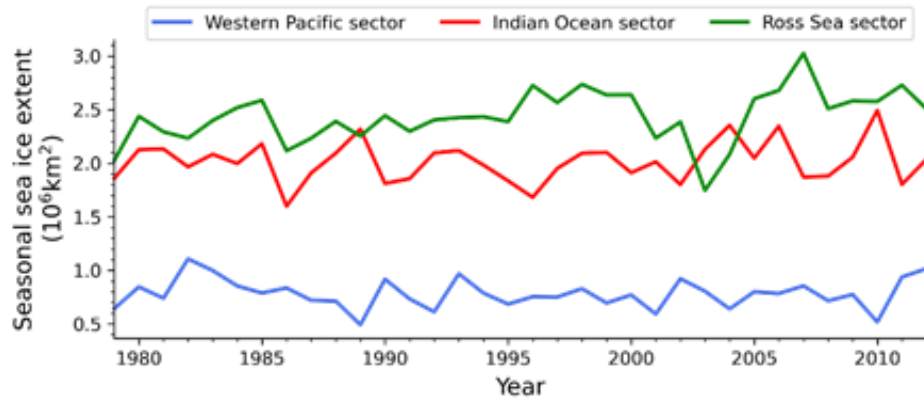

**Figure S3** – Sea ice extent in  $10^6 \text{ km}^2$  for the Western Pacific (blue line), Indian Ocean (red line) and Ross Sea (green line) sectors. Data from Parkinson et al., 2012.

Parkinson, C. L., and D. J. Cavalieri, 2012: Antarctic sea ice variability and trends, 1979-2010, *The Cryosphere*, 6, 871-880, doi:10.5194/tc-6-871-2012.
