# Supplementary material for: 200-years ice core bromine reconstruction at Dome C (Antarctica): observational and modelling results
Source: Copernicus journal article supplement (doi:10.5194/tc-2022-139), 2022-09-02
Supplement: Supplementary file 2 [file tc-2022-139-supplement.pdf]

## SUPPLEMENTARY INFORMATION

### **200-years ice core bromine reconstruction at Dome C (Antarctica): observational and modelling results**

François Burgay<sup>1,2</sup>, Rafael P. Fernandez<sup>3</sup>, Delia Segato<sup>2,4</sup>, Clara Turetta<sup>2,4</sup>, Christopher S. Blaszcak-Boxe<sup>5</sup>, Rachael. H. Rhodes<sup>6</sup>, Claudio Scarchilli<sup>7</sup>, Virginia Ciardini<sup>7</sup>, Carlo Barbante<sup>2,4</sup>, Alfonso Saiz-Lopez<sup>8</sup> and Andrea Spolaor<sup>2,4\*</sup>

<sup>1</sup>Paul Scherrer Institute, Laboratory of Environmental Chemistry (LUC), 5232 Villigen PSI, Switzerland

<sup>2</sup>University Ca' Foscari of Venice, Department of Environmental Sciences, Informatics and Statistics, 30172 Venice Mestre, Italy

<sup>3</sup>Institute for Interdisciplinary Science, National Research Council (ICB-CONICET), FCEN-UNCuyo, Mendoza, 5501, Argentina

<sup>4</sup>National Research Council, Institute of Polar Sciences, 30172 Venice Mestre, Italy

<sup>5</sup>Department of Geosciences, The Pennsylvania State University, State College, PA 16803, United States

<sup>6</sup>Department of Earth Sciences, University of Cambridge, Cambridge, United Kingdom

<sup>7</sup>Laboratory of Observations And Measures for the Environment and Climate (SSPT-PROTER-OEM), ENEA, Rome, Italy

<sup>8</sup>Department of Atmospheric Chemistry and Climate, Institute of Physical Chemistry Rocasolano, CSIC, Madrid, Spain

\*Corresponding author: [andrea.spolaor@cnr.it](mailto:andrea.spolaor@cnr.it)

Number of pages: 4

Number of figures: 3

SUPPORTING INFORMATION SUMMARY: we provide further information about the back-trajectory calculations, photolysis rate at different wavelength ranges and additional figures to highlight the negligible role of volcanic eruptions in affecting bromine preservation at Dome C.

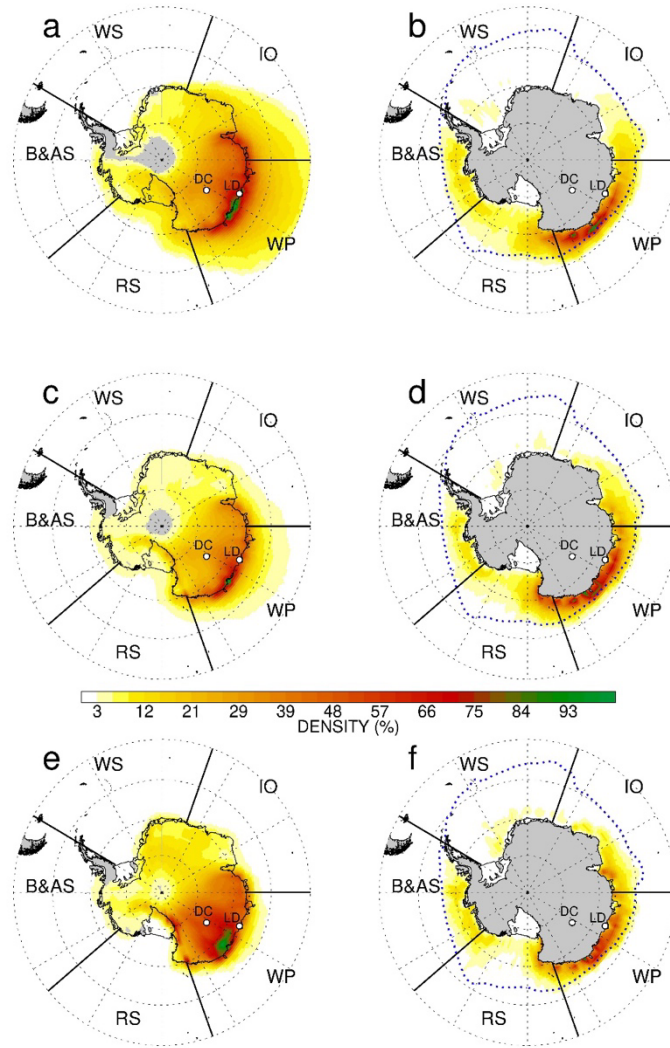

**Figure S1** - 5-days back-trajectory analysis of air masses arriving at the Dome C site for the period 1979-2018. The back-trajectories are calculated at (a,b) 1000 m, (c,d) 2000 m, (e,f) 3000 m above Dome C model terrain height for the period 1979-2018. Maps are divided into five sectors: Indian Ocean (IO, 20°-90°), Western Pacific Ocean (WP, 90°-150°), Ross Sea (RS, 160°-230°) and Bellingshausen & Amundsen seas (B&A, 230°-20°). Panels on the left (a, c, e) represent the sum of the total number of backward trajectory points (i.e. hours) within the fifth and the second days, found in each 1° x 1° grid cell . Panels on the right (b, d, f) represent backward trajectory points (i.e. hours) within the MBL that cross areas with > 15% sea ice concentration at the given point of time. Each contour is normalized from 0 to 100 rescaling with respect to its maximum values and resampled to 0.5° x 0.5° grid mesh in order to increase readability. The blue dashed line represents the median ice edge in September (maximum extent) over the period 1979-2018.

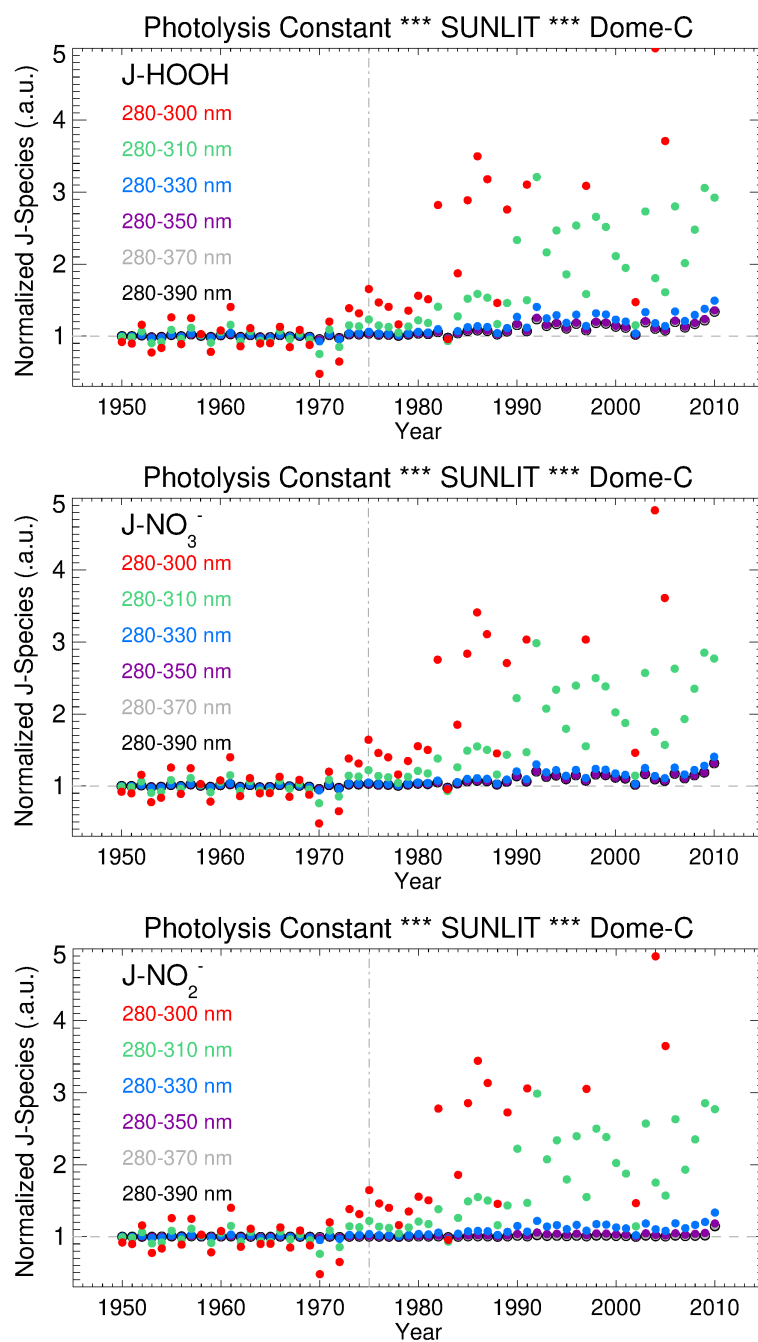

**Figure S2** - The photolysis rate (normalized J-value) is reported for H<sub>2</sub>O<sub>2</sub> (upper panel), NO<sub>3</sub><sup>-</sup> (middle panel) and NO<sub>2</sub><sup>-</sup> (bottom panel) calculated over different wavelength ranges (see main text for more details).

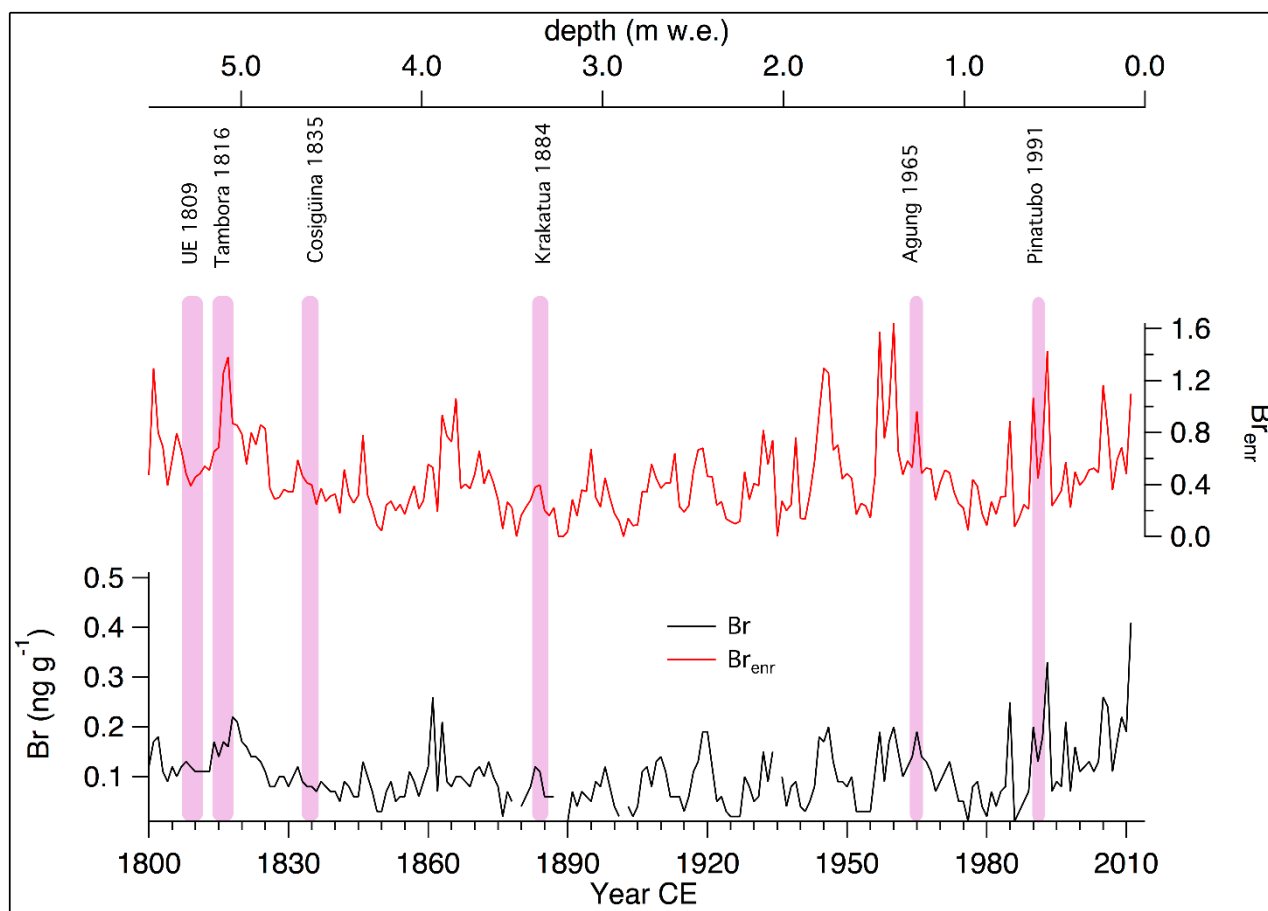

**Figure S3** - Br<sub>enr</sub> (top, red curve), Br (bottom, black curve) records and volcanic eruptions (highlighted with pink vertical bar). Ice core depth is expressed as meters of water equivalent (m w.e.).
